# Supplementary material for: UV-Induced Photocatalytic Cashmere Fibers
Source: Materials (Basel). 2017 Dec 11;10(12):1414. doi: 10.3390/ma10121414 (PMC5744349; doi:10.3390/ma10121414)
Supplement: Supplementary file 1 [file materials-10-01414-s001.pdf]

# UV-Induced Photocatalytic Cashmere Fibers

Lingyun Wang and Walid A. Daoud\*

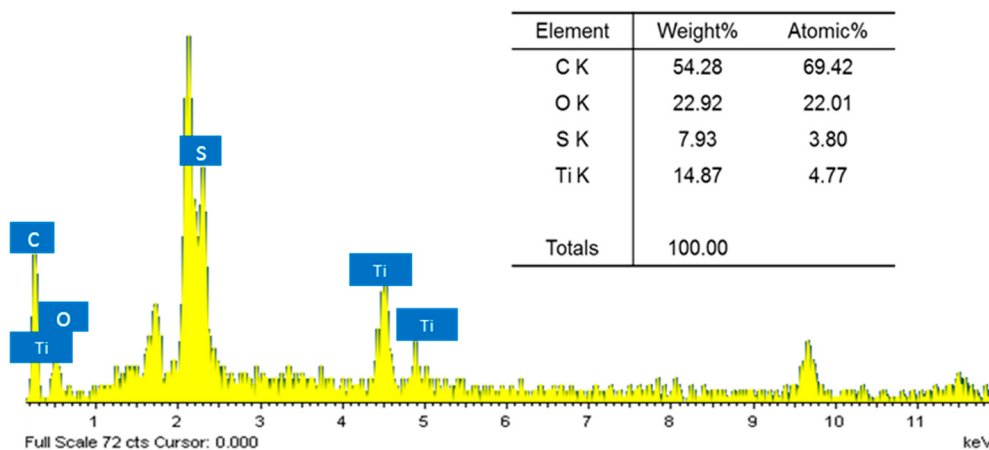

Figure S1. EDS of 10% TiO<sub>2</sub>-coated cashmere.

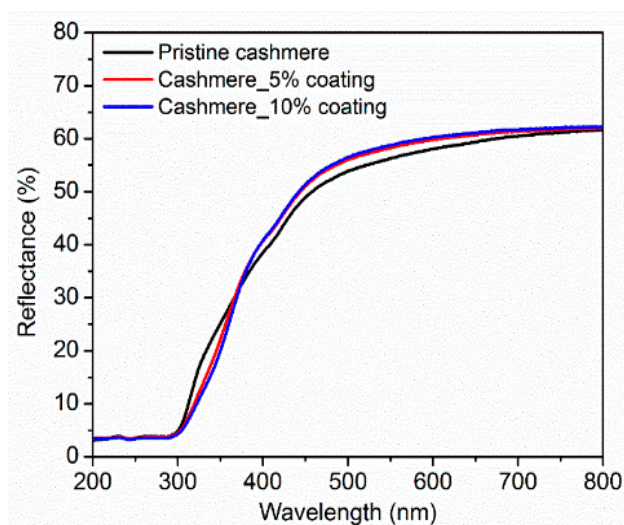

Figure S2. UV-vis diffuse reflectance spectra of pristine and coated cashmere.

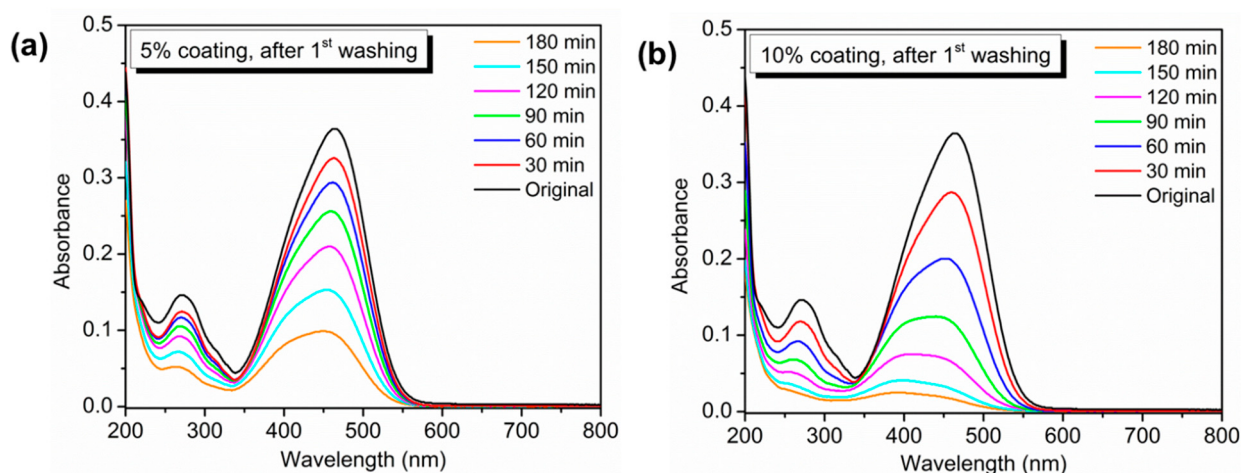

**Figure S3.** Absorption spectra of MO in presence of cashmere fabrics with (a) 5% and (b) 10% TiO<sub>2</sub> nano-coatings after the 1st washing.

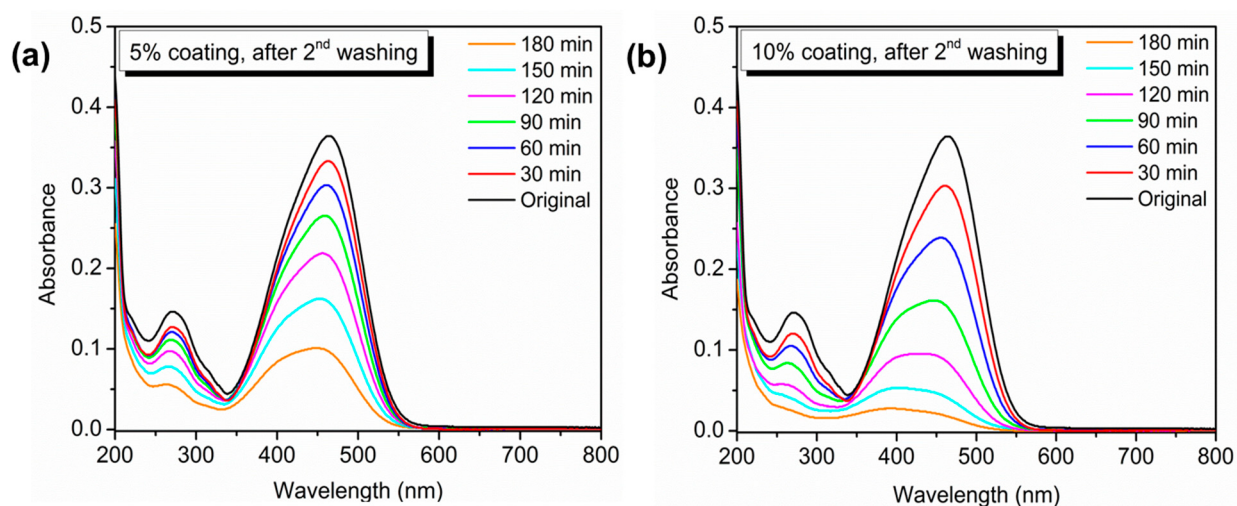

**Figure S4.** Absorption spectra of MO in presence of cashmere fabric with (a) 5% and (b) 10% TiO<sub>2</sub> nano-coating after the 2nd washing.

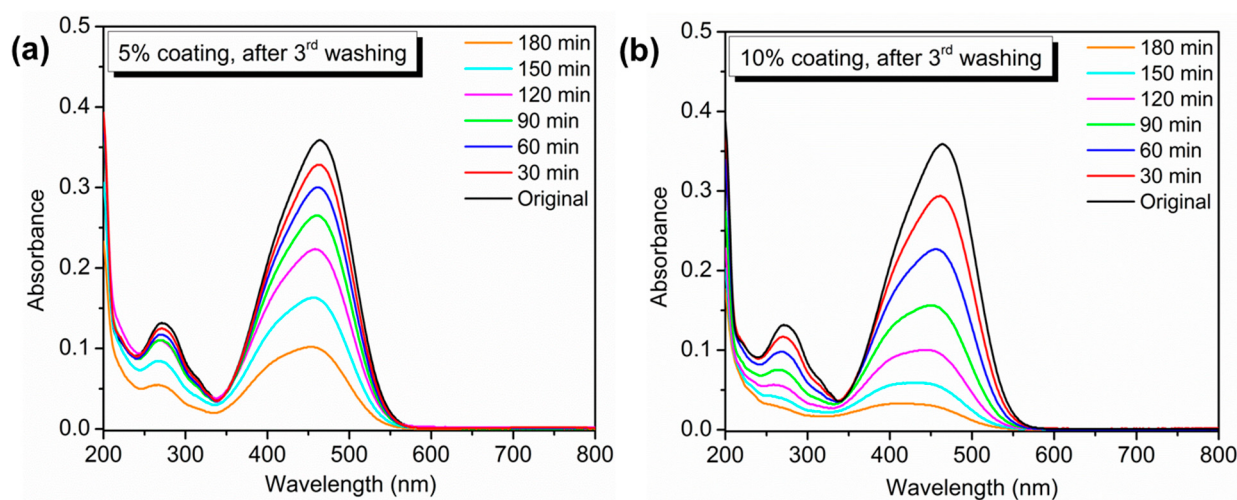

**Figure S5.** Absorption spectra of MO in presence of cashmere fabric with (a) 5% and (b) 10% TiO<sub>2</sub> nano-coating after the 3rd washing.

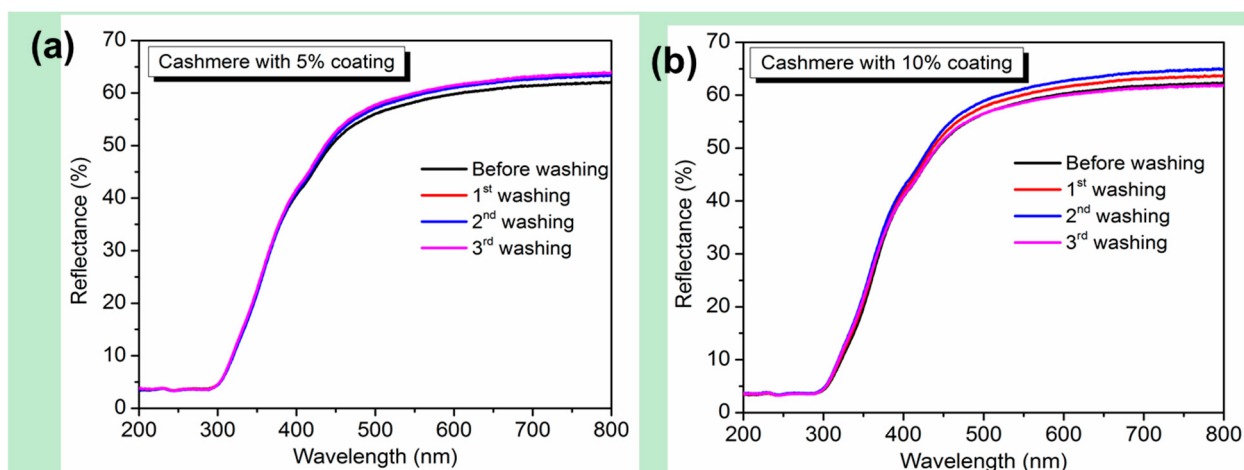

**Figure S6.** UV-vis diffuse reflectance of cashmere with (a) 5% TiO<sub>2</sub> coating and (b) 10% TiO<sub>2</sub> coating after washing.

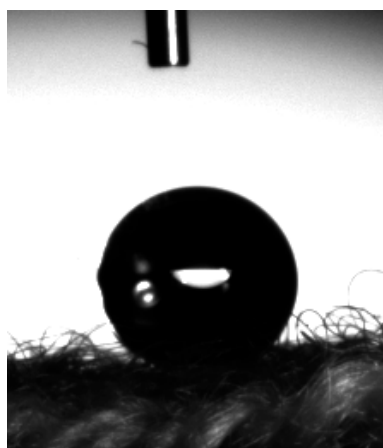

**Figure S7.** Optical image showing water contact angle on pristine cashmere.
